# Supplementary material
Source: PubMed Central journal article supplement (PMC4519749)
Supplement: EC.00054-15_zek999094453so1.pdf [file EC.00054-15_zek999094453so1.pdf]

## Supplementary Figure 1

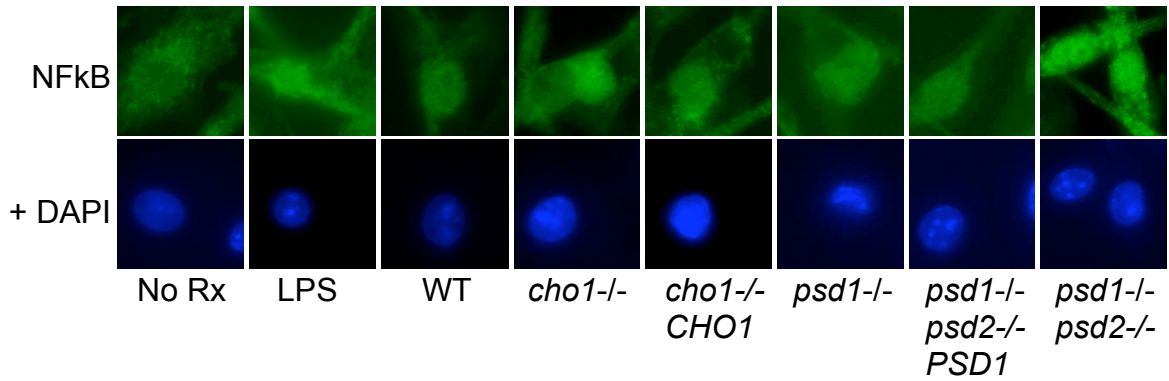

Supplementary Figure 1. Activation of NFkB by EV preparations. BMDM were stimulated by equal sterol concentrations of EV preparations prepared with a 0.8  $\mu$ m filter
